# Supplementary material for: Valley polarization transition driven by biaxial strain in Janus GdClF monolayer
Source: Royal Society of Chemistry journal article supplement (doi:10.1039/d1cp05337j), 2021-12-08
Supplement: d1cp05337j1.pdf [file d1cp05337j1.pdf]

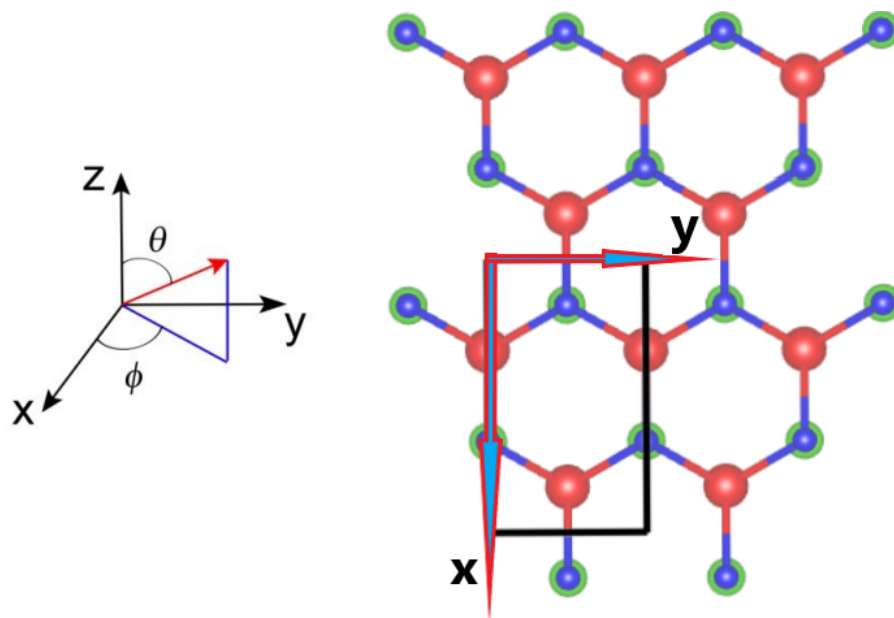

FIG. 1. (Color online) (Left) The defined  $\theta$  and  $\phi$  as the polar angles of spin orientation. (Right) The rectangle supercell is marked by black lines.

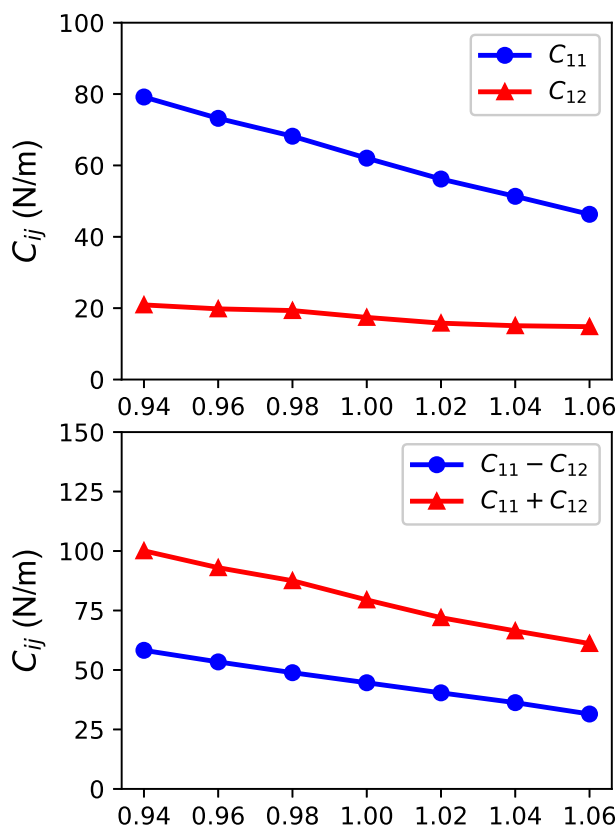

FIG. 2. (Color online) For monolayer GdClF, the elastic constants  $C_{ij}$  with the application of biaxial strain (0.94 to 1.06).

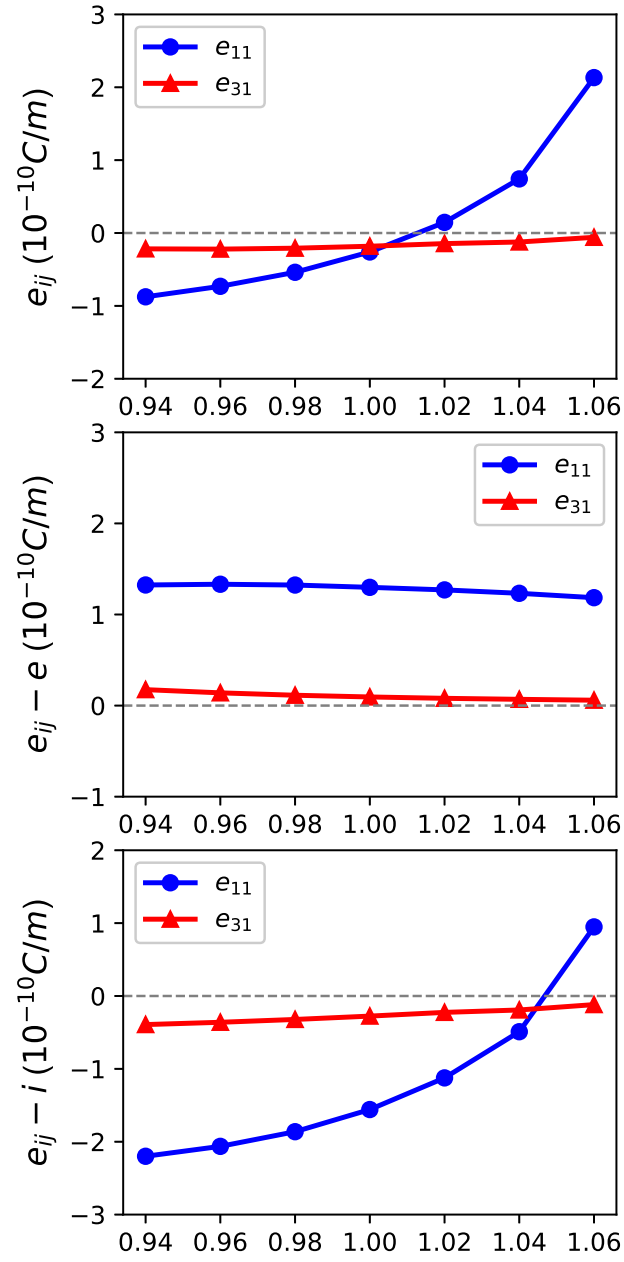

FIG. 3. (Color online) For monolayer GdClF, the piezoelectric stress coefficients  $e_{11}$  and  $e_{31}$  along with the electronic and ionic contributions to  $e_{11}$  and  $e_{31}$  with the application of biaxial strain (0.94 to 1.06).
